# Supplementary material
Source: PubMed Central journal article supplement (PMC6290141)
Supplement: supp_RA118.005583_140414_1_supp_218969_pgn4w4.pdf [file supp_RA118.005583_140414_1_supp_218969_pgn4w4.pdf]

Supporting Information to:

Mechanisms of Concanavalin A-induced cytokine synthesis by hepatic stellate cells: Distinct roles of interferon regulatory factor-1 in liver injury

**Richa Rani<sup>1,2</sup>, Sudhir Kumar<sup>1,2</sup>, Akanksha Sharma<sup>1</sup>, Sujit K. Mohanty<sup>1</sup>, Bryan Donnelly<sup>1</sup>, Gregory M. Tiao<sup>1</sup> and Chandrashekhar R. Gandhi<sup>1,2,3\*</sup>**

Figure S1, related to Figure 1: ConA-induced expression of cytokines in rat HSCs.

Figure S2, related to Figure 2: Binding of ConA and ConA-induced expression of IFN $\beta$  in IRF1-KO HSCs.

Figure S3, related to Figure 4: ConA-induced acute hepatitis in mice.

Figure S4, related to Figure 4: Neutrophil infiltration in ConA-treated mice.

Figure S5, related to Figure 4: Nuclear IRF1 translocation in ConA-treated WT and IFN $\alpha\beta$ R-KO mice.

Figure S6, related to Figure 4: Binding and effects of ConA in HSCs from IFN $\alpha\beta$ R-KO mice.

Figure S7, related to Figure 5: Hepatocytes from IRF1-KO and IFN $\alpha\beta$ R-KO are resistant to oxidative stress and apoptosis by ConA-stimulated WT HSCs.

Figure S8, related to Figure 6: ConA-stimulated WT HSCs do not stimulate JNK or caspase 3 activation in hepatocytes from IRF1-KO and IFN $\alpha\beta$ R-KO mice.

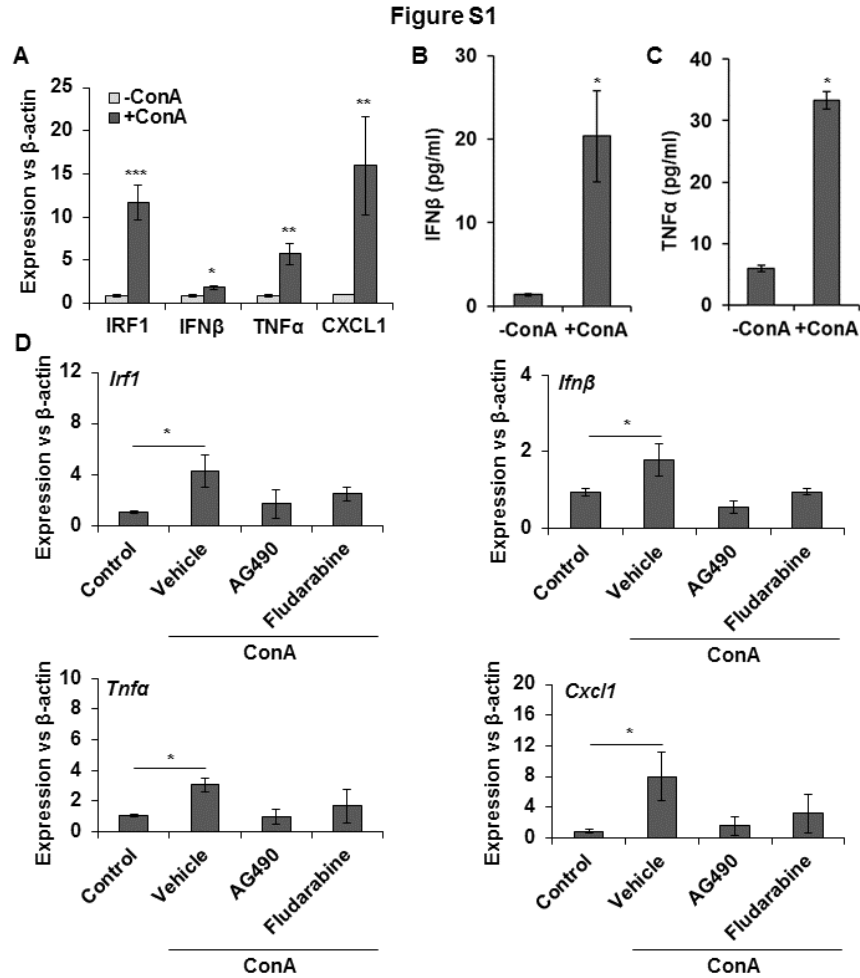

**Figure S1: ConA-induced expression of cytokines in rat HSCs.** (A) mRNA expression of indicated mediators in rat HSCs stimulated with ConA (50  $\mu$ g/ml) for 6h. (B-C) Culture supernatants from ConA-stimulated HSCs were aspirated at 8h for determination of TNF $\alpha$  and IFN $\beta$  by ELISA. (D) HSCs were preincubated in presence of DMSO-vehicle, JAK2 (AG490; 50  $\mu$ M) or STAT1 (Fludarabine; 10  $\mu$ M) inhibitors for 30 min, then stimulated with ConA (50  $\mu$ g/ml) for 6h. Expression of indicated mRNAs was measured by qRT-PCR. The data are representative of three independent experiments, each performed in duplicate or triplicate. \* $p$ <0.05; \*\* $p$ <0.005; \*\*\* $p$ <0.0005.

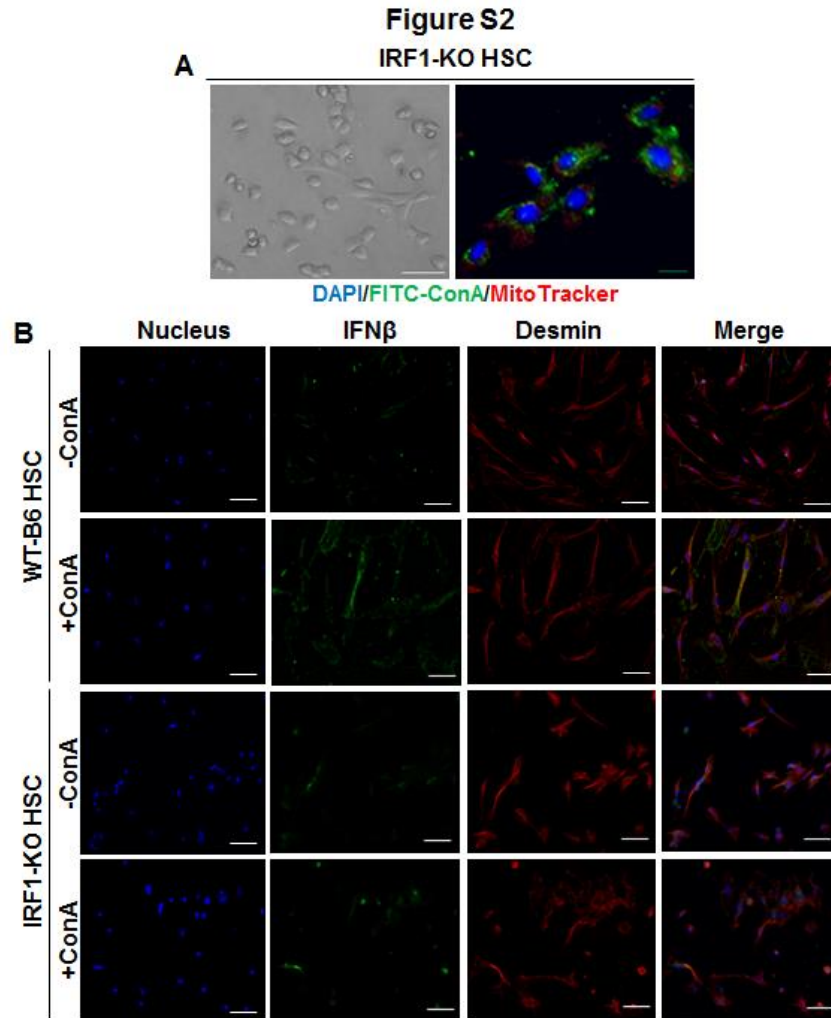

**Figure S2: Binding of ConA and ConA-induced expression of IFN $\beta$  in IRF1-KO HSCs.** (A) Immunofluorescence image showing binding/internalization of FITC-ConA in HSCs isolated from IRF1-KO mice. MitoTracker Red (100 nM) was used to stain mitochondria. Image on the left shows phase-contrast micrograph of IRF1-KO HSCs. Scale bars, 20  $\mu$ m. (B) WT or IRF1-KO HSCs were incubated in presence of ConA (50  $\mu$ g/ml) for 6h and intracellular accumulation of IFN $\beta$  was determined as described in the Methods section.

**Figure S3**

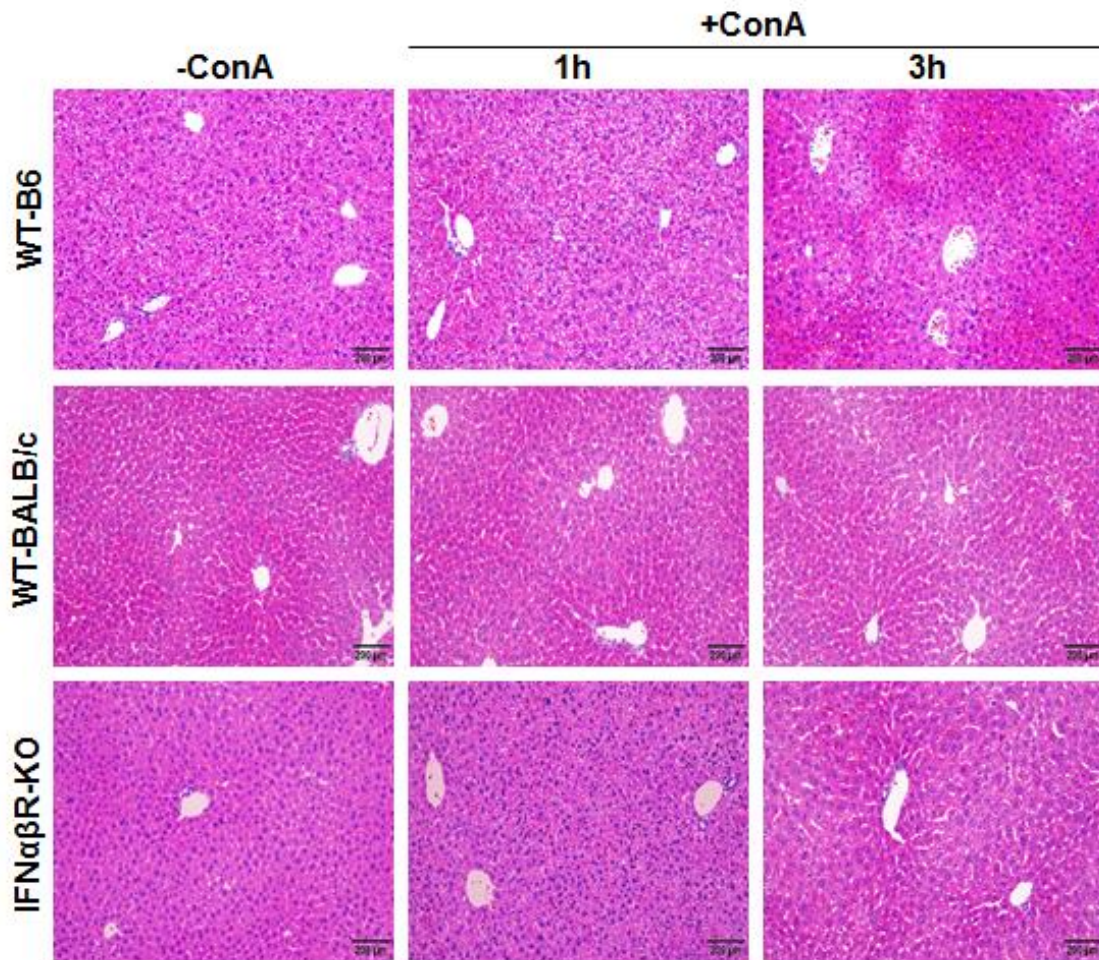

**Figure S3: ConA-induced acute hepatitis in mice.** Representative images of H/E-stained liver sections from mice treated with ConA (20 mg/kg) for 0, 1 or 3h. Scale bars, 200  $\mu$ m.

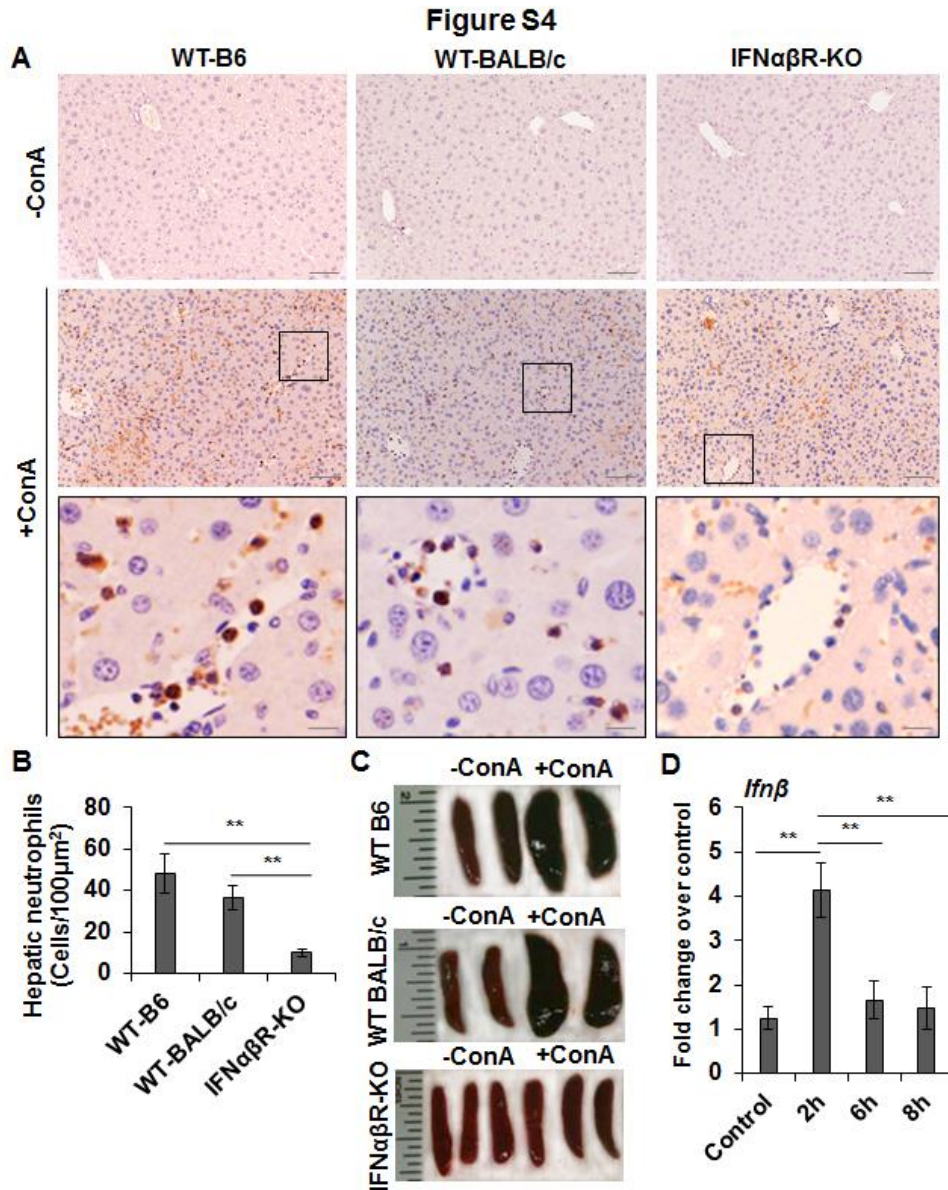

**Figure S4: Neutrophil infiltration in ConA-treated mice.** Mice were euthanized 6h (WT-B6) or 8h (WT-BALB/c or IFN $\alpha\beta$ R-KO) after administering 20 mg/kg ConA. (A) Liver sections were immunostained to detect neutrophils. Hardly any neutrophils are observed in the livers of vehicle-treated mice; large number of neutrophil infiltrates are seen in ConA-treated WT mice compared to very few in the IFN $\alpha\beta$ R-KO mice. Scale bars, 100  $\mu$ m (upper and middle panels) and 50  $\mu$ m (lower panels). (B) Bar graph shows quantification of infiltrated hepatic neutrophils. (C) Spleen size of ConA-treated mice show enlargement in WT but not in IFN $\alpha\beta$ R-KO mice. (D) IFN $\beta$  mRNA expression in ConA-challenged IFN $\alpha\beta$ R-KO mice at indicated time points. (n=4 to 6 mice/group). \*\*p < 0.005.



Figure S5

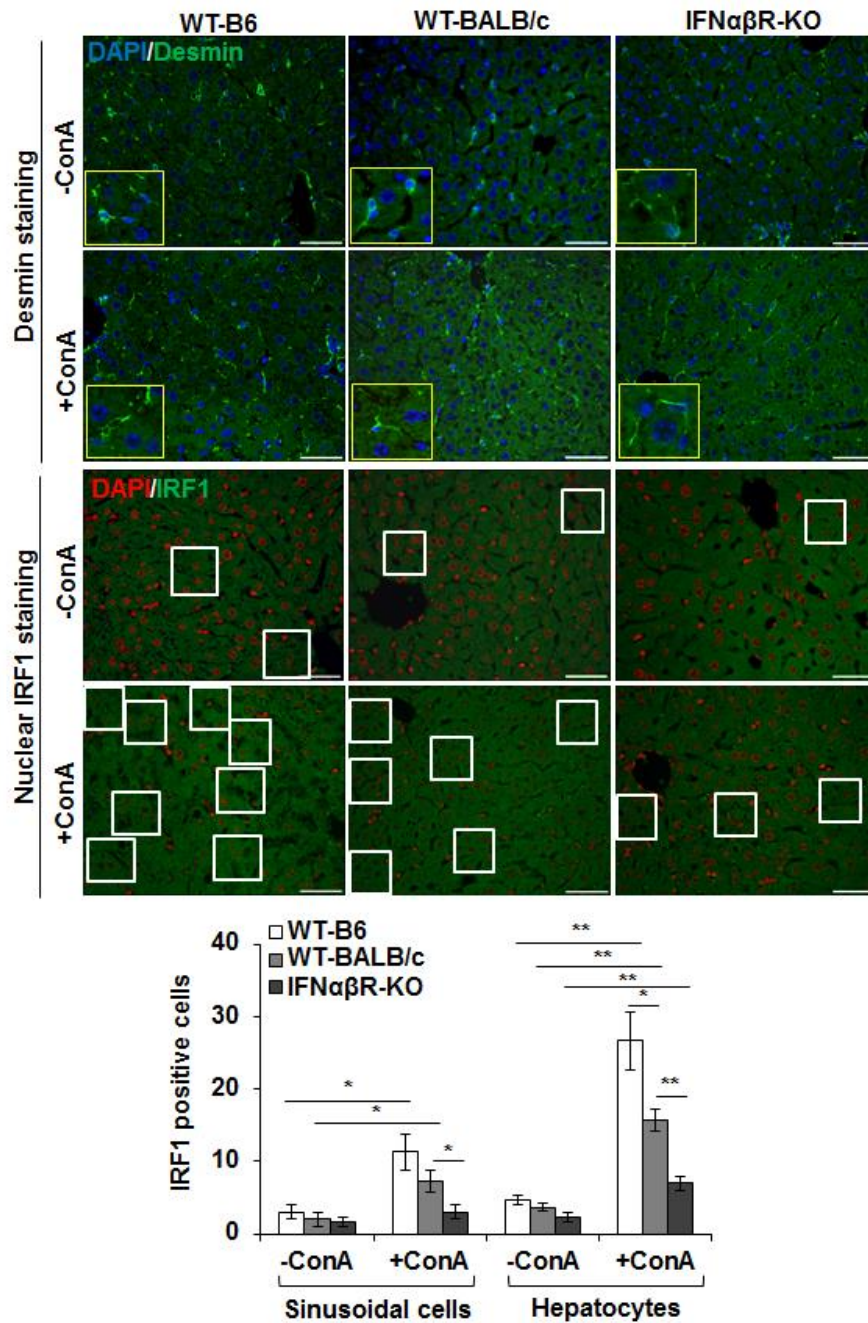

**Figure S5: Nuclear IRF1 translocation in ConA-treated WT and IFN $\alpha\beta$ R-KO mice.** Mice were euthanized 6h (WT-B6) or 8h (WT-BALB/c or IFN $\alpha\beta$ R-KO) after administering 20 mg/kg ConA. Representative sections of the vehicle- or ConA-treated livers were immunostained for the expression of desmin (inset) or nuclear IRF1 (boxed area). Scale bars, 50  $\mu$ m. Bar graph shows quantification of nuclear IRF1-positive nonparenchymal cells and hepatocytes. \* $p$ <0.05; \*\* $p$ <0.005.

Figure S6

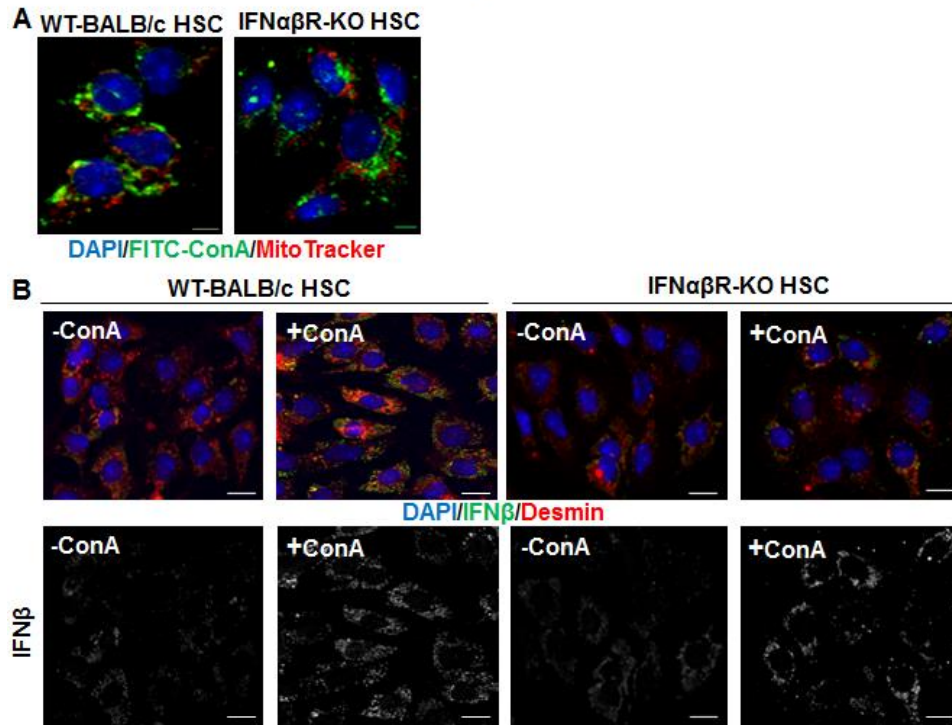

**Figure S6: Binding and effects of ConA in HSCs from IFN $\alpha\beta$ R-KO mice.** (A) Immunofluorescence image shows binding/internalization of FITC-ConA in HSCs isolated from WT-BALB/c and IFN $\alpha\beta$ R-KO mice. DAPI (blue) and MitoTracker Red (100 nM) was used to stain nuclei and mitochondria, respectively. (B) WT-BALB/c or IFN $\alpha\beta$ R-KO HSCs were incubated in presence of ConA (50  $\mu$ g/ml) for 6h and intracellular accumulation of IFN $\beta$  was determined. Scale bars, 20  $\mu$ m.

**Figure S7**

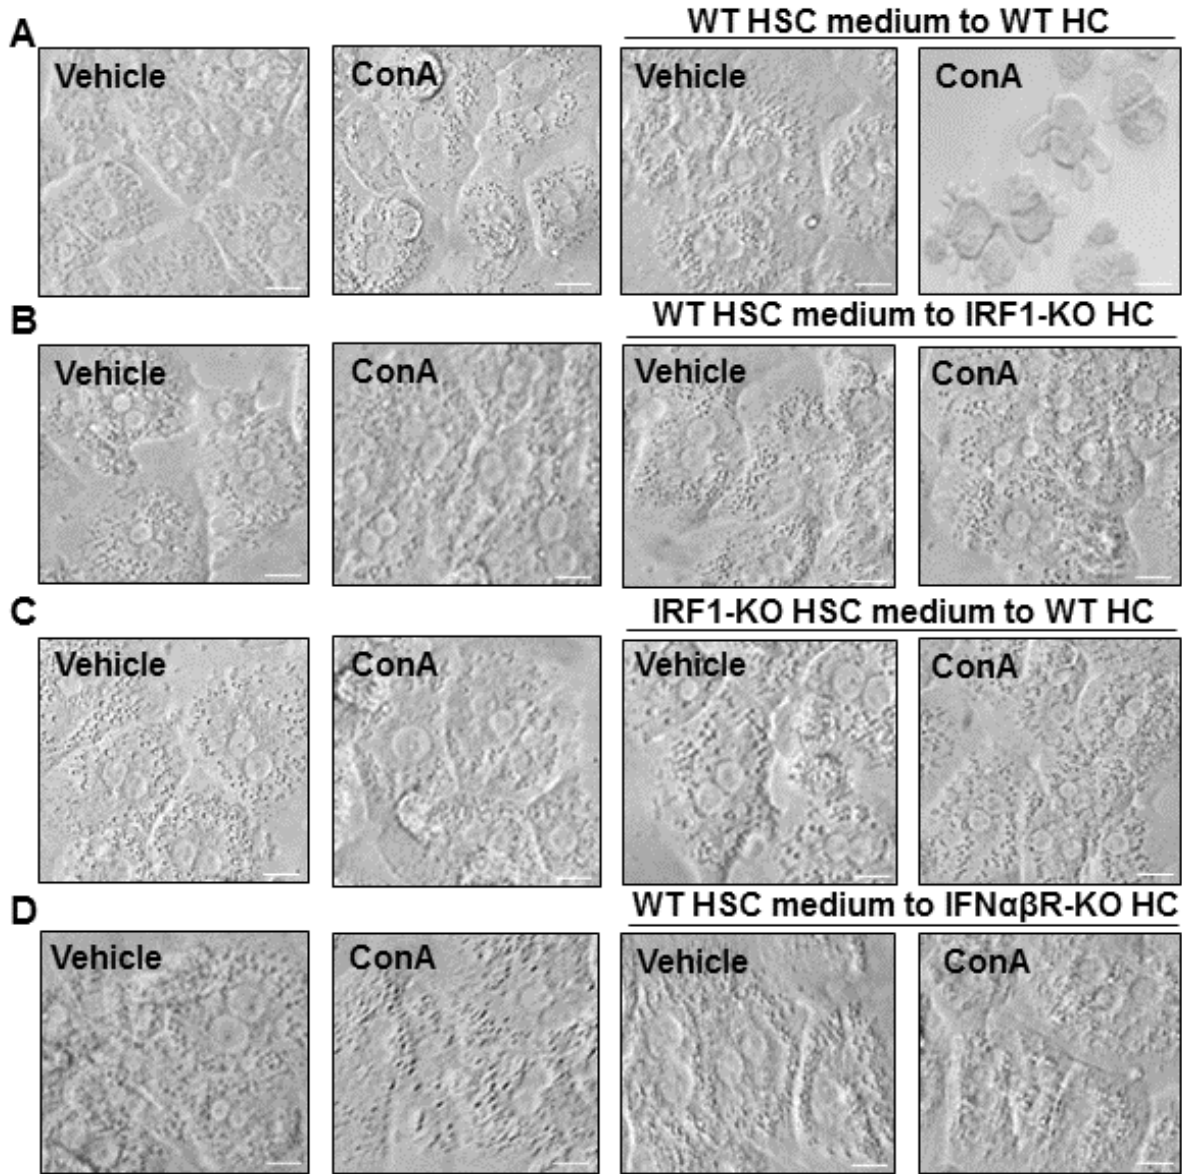

**Figure S7: Hepatocytes from IRF1-KO and IFN $\alpha$  $\beta$ R-KO are resistant to oxidative stress and apoptosis by ConA-stimulated WT HSCs. (A-D) Phase contrast images of hepatocytes (WT or IRF1-KO or IFN $\alpha$  $\beta$ R-KO) incubated in medium without or with 50  $\mu$ g/ml ConA or medium conditioned by HSCs (WT or IRF1-KO) for 8h in absence or presence of ConA. Scale bars, 20  $\mu$ m.**



Figure S8

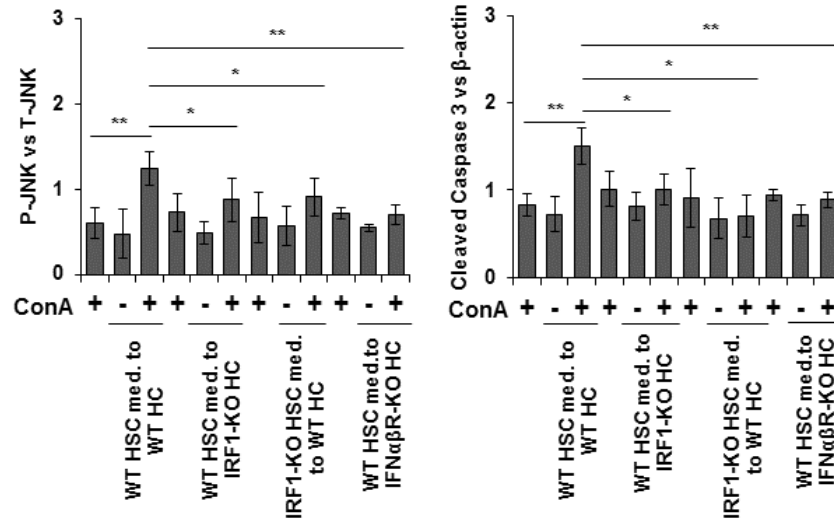

**Figure S8: ConA-stimulated WT HSCs do not stimulate JNK or caspase 3 activation in hepatocytes from IRF1-KO and IFN $\alpha$  $\beta$ R-KO mice.** Bar graphs show densitometric analysis of the immunoblots in Figure 6A, for P-JNK and cleaved caspase-3 normalized to T-JNK and  $\beta$ -actin, respectively. \*p<0.05; \*\*p<0.005.
